# Supplementary material
Source: HighWire-hosted journal article supplement (https://bjo.bmj.com/content/106/8/1132)

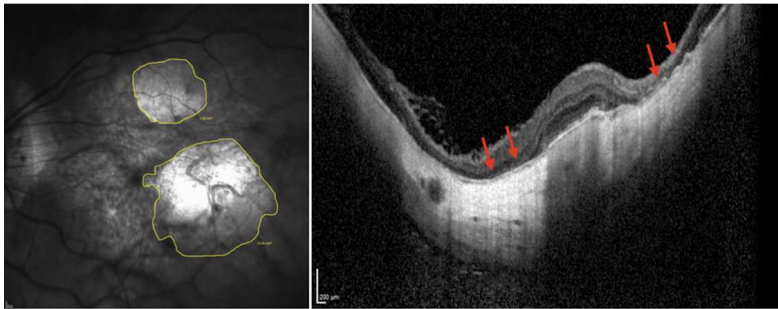

Patchy atrophy

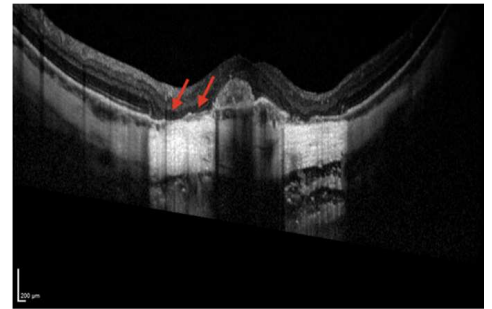

CNV-related macular atrophy

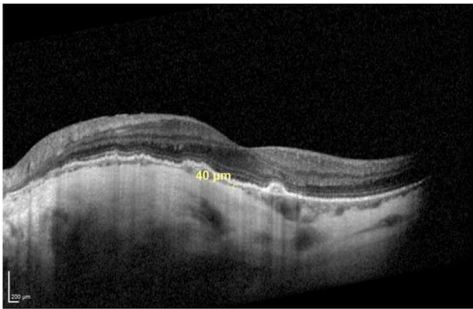

Subfoveal choroidal thickness

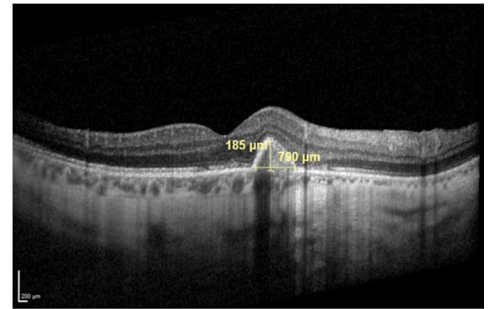

CNV size

Supplement: inline-supplementary-material-2 [file inline-supplementary-material-2.pdf]
